# Supplementary material
Source: PubMed Central journal article supplement (PMC8410880)
Supplement: NIHMS1680531-supplement-1.pdf [file NIHMS1680531-supplement-1.pdf]

ONLINE SUPPLEMENT

## Maternal 17q21 Genotype Influences Prenatal Vitamin D Effects on Offspring Asthma/Recurrent Wheeze

**Authors:** Hanna M. Knihtilä, MD, PhD<sup>1</sup>; Rachel S. Kelly, PhD<sup>1</sup>; Nicklas Brustad, MD<sup>1,2</sup>; Mengna Huang, PhD<sup>1</sup>; Priyadarshini Kachroo, PhD<sup>1</sup>; Bo L. Chawes, MD, PhD, DMSc<sup>2</sup>; Jakob Stokholm, MD, PhD<sup>2</sup>; Klaus Bønnelykke, MD, PhD<sup>2</sup>; Casper-Emil T. Pedersen, MSc, PhD<sup>2</sup>; Hans Bisgaard, MD, DMSc<sup>2</sup>; Augusto A. Litonjua, MD, MPH<sup>3</sup>; Jessica A. Lasky-Su, ScD<sup>1</sup>; Scott T. Weiss, MD, MS<sup>1</sup>

**Affiliations:** <sup>1</sup>Channing Division of Network Medicine, Brigham and Women's Hospital and Harvard Medical School, Boston, MA, United States

<sup>2</sup>COPSAC, Copenhagen Prospective Studies on Asthma in Childhood, Herlev and Gentofte Hospital, University of Copenhagen, Denmark

<sup>3</sup>Division of Pediatric Pulmonary Medicine, Golisano Children's Hospital, University of Rochester Medical Center, Rochester, NY, United States

**Corresponding author:** Scott T. Weiss, MD, MS. Channing Division of Network Medicine, Department of Medicine, Brigham and Women's Hospital, 181 Longwood Avenue, Boston, MA 02115. Telephone: 617-525-2278. Fax: 617-525-0958. Email: [scott.weiss@channing.harvard.edu](mailto:scott.weiss@channing.harvard.edu).

**Table E1. Number of subjects randomized to each prenatal supplementation group in COPSAC<sub>2010</sub> stratified by maternal 17q21 genotype.**

|                                     | Mother rs12936231 genotype |          |          | P value |
|-------------------------------------|----------------------------|----------|----------|---------|
|                                     | GG                         | GC       | CC       |         |
| N                                   | 152                        | 263      | 148      |         |
| Placebo only                        | 40 (26%)                   | 65 (25%) | 42 (28%) | 0.579   |
| Vitamin D <sub>3</sub> only         | 41 (27%)                   | 67 (26%) | 36 (24%) |         |
| Fish oil only                       | 41 (27%)                   | 62 (24%) | 29 (20%) |         |
| Vitamin D <sub>3</sub> and fish oil | 30 (20%)                   | 69 (26%) | 41 (28%) |         |

**Table E2. The effect of prenatal vitamin D<sub>3</sub> supplementation on the development of early life asthma/recurrent wheeze stratified by maternal 17q21 genotype when excluding subjects receiving fish oil supplementation in COPSAC<sub>2010</sub>.**

| <b>Mother rs12936231 genotype</b> | <b>Cases/Total</b> | <b>HR<br/>(95% CI)</b> | <b>P value</b> |
|-----------------------------------|--------------------|------------------------|----------------|
| GG/GC*                            | 39/213             | 0.44<br>(0.23-0.86)    | <b>0.016</b>   |
| CC                                | 19/78              | 0.92<br>(0.38-2.27)    | 0.863          |

\*Combined maternal GG-genotype and GC-genotype.

Analyses were performed using Cox proportional hazard regression. G is considered as the dominant low-risk allele and C as the recessive high-risk allele.

**Table E3. The effect of prenatal vitamin D<sub>3</sub> supplementation on the development of early life asthma/recurrent wheeze stratified by maternal and child 17q21 genotype based on maternal 25-hydroxyvitamin D (25[OH]D) level at randomization (10-18 gestational weeks).**

| 25(OH)D level <30 ng/ml |             |      |              |                        |      |              |
|-------------------------|-------------|------|--------------|------------------------|------|--------------|
| Mother                  | VDAART      |      |              | COPSAC <sub>2010</sub> |      |              |
| rs12936231              | Cases/Total | HR   | P value      | Cases/Total            | HR   | P value      |
| genotype                |             |      |              |                        |      |              |
| GG/GC*                  | 99/326      | 0.51 | <b>0.002</b> | 35/201                 | 0.70 | 0.294        |
| GG                      | 27/103      | 0.39 | <b>0.030</b> | 13/66                  | 0.28 | 0.094        |
| GC                      | 72/223      | 0.56 | <b>0.017</b> | 22/135                 | 1.05 | 0.910        |
| CC                      | 43/145      | 1.26 | 0.448        | 14/68                  | 1.37 | 0.576        |
| 25(OH)D level ≥30 ng/ml |             |      |              |                        |      |              |
| Mother                  | VDAART      |      |              | COPSAC <sub>2010</sub> |      |              |
| rs12936231              | Cases/Total | HR   | P value      | Cases/Total            | HR   | P value      |
| genotype                |             |      |              |                        |      |              |
| GG/GC*                  | 28/105      | 0.62 | 0.209        | 35/210                 | 0.46 | <b>0.030</b> |
| GG                      | 7/29        | 0.42 | 0.295        | 12/85                  | 0.85 | 0.783        |
| GC                      | 21/76       | 0.68 | 0.372        | 23/125                 | 0.32 | <b>0.018</b> |
| CC                      | 6/35        | 0.29 | 0.254        | 16/80                  | 0.93 | 0.877        |

\*Combined GG-genotype and GC-genotype.

Analyses were performed using Cox proportional hazard regression. G is considered as the dominant low-risk allele and C as the recessive high-risk allele.

**Table E4. Multivariable model† for the interaction between maternal 17q21 genotype and prenatal fish oil supplementation on the risk of offspring asthma/recurrent wheeze at age 0-3 years in COPSAC<sub>2010</sub> (n=563).**

|                                                  | <b>Estimate</b> | <b>P value</b> |
|--------------------------------------------------|-----------------|----------------|
| Additive model                                   |                 |                |
| Mother rs12936231 genotype                       | 0.01            | 0.665          |
| Fish oil intervention                            | 0.04            | 0.524          |
| Mother rs12936231 genotype*Fish oil intervention | 0.01            | 0.860          |
| Dominant model                                   |                 |                |
| Mother rs12936231 genotype                       | <0.01           | 0.930          |
| Fish oil intervention                            | 0.03            | 0.452          |
| Mother rs12936231 genotype*Fish oil intervention | 0.05            | 0.473          |

†Based on the model: asthma/recurrent wheeze ~ mother genotype\*fish oil intervention + child sex.

The additive model compares maternal genotypes GG vs. GC vs. CC and the dominant model compares maternal genotypes GG/GC vs. CC.

**Table E5. Association between blood peak intensity of sphingolipid metabolites at ages 1 and 3 years and vitamin D<sub>3</sub> supplementation of children in the VDAART cohort stratified by the mother and child 17q21 genotype combinations.**

|                                | <b>Coefficient</b> | <b>p</b>     |
|--------------------------------|--------------------|--------------|
| <b>Sphinganine-1-phosphate</b> |                    |              |
| Mother and child GG/GC         | 0.028              | <b>0.013</b> |
| Mother GC and child CC         | -0.013             | 0.593        |
| Mother CC and child GC         | -0.024             | 0.258        |
| Mother and child CC            | -0.033             | 0.799        |
| <b>Sphinganine</b>             |                    |              |
| Mother and child GG/GC         | 0.048              | <b>0.025</b> |
| Mother GC and child CC         | -0.026             | 0.558        |
| Mother CC and child GC         | -0.042             | 0.192        |
| Mother and child CC            | -0.008             | 0.831        |
| <b>Sphingosine-1-phosphate</b> |                    |              |
| Mother and child GG/GC         | 0.015              | <b>0.032</b> |
| Mother GC and child CC         | -0.007             | 0.620        |
| Mother CC and child GC         | -0.011             | 0.388        |
| Mother and child CC            | -0.032             | <b>0.010</b> |
| <b>Sphingosine</b>             |                    |              |
| Mother and child GG/GC         | 0.049              | <b>0.012</b> |
| Mother GC and child CC         | -0.027             | 0.489        |
| Mother CC and child GC         | -0.044             | 0.134        |
| Mother and child CC            | -0.015             | 0.635        |
| <b>Phosphoethanolamine</b>     |                    |              |
| Mother and child GG/GC         | 0.003              | 0.791        |
| Mother GC and child CC         | 0.025              | 0.326        |
| Mother CC and child GC         | -0.037             | 0.125        |
| Mother and child CC            | -0.016             | 0.512        |

Number of children with data on age 1 and/or 3 year sphingolipid levels:

Mother and child GG/GC n=291,

Mother GC and child CC n=66,

Mother CC and child GC n=78,

Mother and child CC n=79.
